# Supplementary material for: Governance and the loss of biodiversity
Source: Springer Nature journal article supplement (doi:10.1038/nature02025), 2003-11-01
Supplement: nature02025-s1.pdf [file nature02025-s1.pdf]

## Supplementary information for 2003-06-05570A

### Table Legends

**Table 1** Data used to investigate correlations between change in forest cover (1990-95) and a range of socio-economic factors.

**Table 2** Data used in stepwise regression modelling to find socio-economic factors that best explain changes in national populations of African elephants and black rhinoceros between 1987 and 1994.

**Table 3** Data used to investigate links between countries that have been identified as containing priority areas for conservation and national governance scores.

Supplementary information for 2003-06-05570A: Table 1

| Country            | Change in natural forest cover (%) | Change in total forest cover (%) | Mean modelled governance score | Mean per capita GDP | Mean population density (km <sup>-2</sup> ) | Mean HDI score |
|--------------------|------------------------------------|----------------------------------|--------------------------------|---------------------|---------------------------------------------|----------------|
| Algeria            | -1.63                              | -1.22                            | 3.18                           | 1691.7              | 11.1                                        | 0.64           |
| Angola             | -1.05                              | -0.95                            | 2.76                           | 673.3               | 8.1                                         |                |
| Argentina          | -0.27                              | -0.26                            | 3.80                           | 6538.7              | 12.3                                        | 0.81           |
| Australia          |                                    | 0.04                             | 8.31                           | 18153.1             | 2.3                                         | 0.89           |
| Austria            |                                    | 0.00                             | 8.31                           | 24085.5             | 95.7                                        | 0.89           |
| Bangladesh         | -3.14                              | -0.85                            | 1.95                           | 293.9               | 884.6                                       | 0.42           |
| Belgium            |                                    | 0.00                             | 8.14                           | 22688.1             | 329.7                                       | 0.90           |
| Bolivia            | -1.17                              | -1.17                            | 2.23                           | 887.0               | 6.4                                         | 0.60           |
| Botswana           | -0.50                              | -0.50                            | 4.57                           | 3021.7              | 2.4                                         | 0.65           |
| Brazil             | -0.46                              | -0.46                            | 4.37                           | 3109.7              | 18.2                                        | 0.72           |
| Bulgaria           |                                    | 0.02                             | 4.48                           | 1297.7              | 76.9                                        | 0.79           |
| Burkina Faso       | -0.74                              | -0.74                            | 3.15                           | 256.7               | 34.5                                        | 0.29           |
| Cameroon           | -0.65                              | -0.65                            | 3.63                           | 848.3               | 26.5                                        | 0.51           |
| Canada             |                                    | 0.07                             | 9.85                           | 20246.3             | 3.1                                         | 0.93           |
| Chile              | -0.42                              | -0.37                            | 3.57                           | 3343.8              | 18.2                                        | 0.79           |
| China              | -0.48                              | -0.06                            | 4.44                           | 441.7               | 125.5                                       | 0.63           |
| Colombia           | -0.49                              | -0.49                            | 3.35                           | 1732.4              | 35.4                                        | 0.73           |
| Congo              | -0.21                              | -0.21                            | 2.73                           | 1081.1              | 7.0                                         | 0.51           |
| Costa Rica         | -3.13                              | -3.07                            | 4.95                           | 2760.1              | 62.0                                        | 0.79           |
| Cote d'Ivoire      | -0.57                              | -0.56                            | 4.28                           | 785.7               | 39.5                                        | 0.42           |
| Cuba               | -1.42                              | -1.24                            | 3.73                           |                     | 99.0                                        |                |
| Dem. Rep. of Congo | -0.67                              | -0.67                            | 1.49                           | 178.4               | 17.9                                        |                |
| Denmark            |                                    | 0.00                             | 9.85                           | 28473.1             | 122.0                                       | 0.89           |
| Dominican Republic | -1.61                              | -1.60                            | 3.37                           | 1221.8              | 154.4                                       | 0.68           |
| Ecuador            | -1.64                              | -1.63                            | 3.50                           | 1240.8              | 39.2                                        | 0.71           |
| Egypt              | 0.00                               | 0.00                             | 3.40                           | 801.9               | 55.6                                        | 0.58           |
| Ethiopia           | -0.46                              | -0.45                            | 2.16                           | 150.6               | 48.9                                        | 0.30           |
| Finland            |                                    | -0.08                            | 9.85                           | 22725.4             | 16.6                                        | 0.90           |

|               |       |       |      |         |       |      |
|---------------|-------|-------|------|---------|-------|------|
| France        |       | 1.10  | 8.77 | 23322.1 | 106.7 | 0.90 |
| Gabon         | -0.50 | -0.50 | 2.75 | 5282.6  | 4.0   |      |
| Germany       |       | 0.00  | 9.10 | 24343.1 | 231.1 | 0.89 |
| Ghana         | -1.27 | -1.26 | 3.89 | 391.2   | 70.2  | 0.51 |
| Greece        |       | 2.29  | 5.82 | 9369.9  | 80.2  | 0.86 |
| Guatemala     | -2.05 | -2.04 | 2.08 | 1112.2  | 86.2  | 0.58 |
| Guinea-Bissau | -0.44 | -0.45 | 2.13 | 238.3   | 28.4  | 0.31 |
| Guinea        | -1.14 | -1.14 | 3.41 | 519.5   | 25.1  |      |
| Guyana        | -0.05 | -0.05 | 2.18 | 581.9   | 3.8   | 0.68 |
| Honduras      | -2.34 | -2.34 | 2.37 | 607.0   | 47.0  | 0.62 |
| Hungary       |       | 0.52  | 6.15 | 3774.8  | 111.6 | 0.81 |
| Iceland       |       | 0.00  | 9.85 | 24755.8 | 2.6   | 0.91 |
| India         | -0.53 | 0.01  | 3.43 | 343.9   | 299.3 | 0.52 |
| Indonesia     | -1.02 | -0.96 | 2.86 | 817.7   | 102.7 | 0.63 |
| Iran          | -1.85 | -1.76 | 3.67 | 1505.2  | 34.9  | 0.65 |
| Iraq          | 0.00  | 0.00  | 1.77 |         |       |      |
| Ireland       |       | 2.62  | 7.75 | 15014.9 | 51.7  | 0.87 |
| Italy         |       | 0.09  | 5.22 | 19453.6 | 193.8 | 0.88 |
| Japan         |       | -0.05 | 8.09 | 33215.3 | 330.7 | 0.91 |
| Jordan        | -4.82 | -2.50 | 4.07 | 1305.3  | 42.4  | 0.68 |
| Kenya         | -0.28 | -0.26 | 3.80 | 311.4   | 44.6  | 0.53 |
| Liberia       | -0.58 | -0.59 | 1.42 |         |       |      |
| Libya         | 0.00  | 0.00  | 3.83 | 5664.8  |       |      |
| Madagascar    | -0.85 | -0.84 | 3.50 | 249.8   | 21.4  | 0.44 |
| Malawi        | -1.63 | -1.57 | 2.91 | 194.5   | 96.9  | 0.37 |
| Malaysia      | -2.47 | -2.43 | 4.10 | 3334.3  | 59.0  | 0.73 |
| Mali          | -0.96 | -0.96 | 2.19 | 263.1   | 7.4   | 0.32 |
| Mexico        | -0.90 | -0.90 | 3.28 | 3782.8  | 45.5  | 0.76 |
| Mongolia      | 0.00  | 0.00  | 3.93 | 509.7   |       | 0.65 |
| Morocco       | -0.33 | -0.31 | 3.50 | 1113.3  | 56.5  | 0.55 |
| Mozambique    | -0.68 | -0.68 | 3.66 | 159.0   | 19.0  | 0.31 |
| Myanmar       | -1.42 | -1.38 | 2.31 | 80.6    |       |      |
| Namibia       | -0.34 | -0.34 | 5.54 | 1865.1  | 1.8   | 0.63 |
| Netherlands   |       | 0.00  | 9.85 | 22141.5 | 448.7 | 0.91 |

|                  |       |       |      |         |       |      |
|------------------|-------|-------|------|---------|-------|------|
| New Zealand      |       | 0.56  | 9.85 | 13571.4 | 13.2  | 0.88 |
| Nicaragua        | -2.55 | -2.54 | 3.96 | 422.5   | 34.0  | 0.60 |
| Niger            | 0.00  | 0.00  | 3.04 | 257.8   | 6.7   | 0.26 |
| Nigeria          | -0.87 | -0.86 | 2.67 | 262.1   | 113.7 | 0.43 |
| North Korea      | 0.00  | 0.00  | 3.31 |         |       |      |
| Norway           |       | 0.34  | 8.92 | 28850.4 | 14.0  | 0.91 |
| Oman             | 0.00  | 0.00  | 3.91 | 6450.0  |       |      |
| Pakistan         | -3.21 | -2.92 | 2.58 | 453.7   | 149.3 | 0.45 |
| Panama           | -2.16 | -2.15 | 2.12 | 2652.8  | 33.8  | 0.75 |
| Papua New Guinea | -0.36 | -0.36 | 3.74 | 1120.3  | 9.0   | 0.49 |
| Paraguay         | -2.65 | -2.65 | 2.59 | 1504.2  | 11.4  | 0.72 |
| Peru             | -0.32 | -0.32 | 2.69 | 1869.3  | 17.6  | 0.71 |
| Philippines      | -3.65 | -3.54 | 2.52 | 851.1   | 222.6 | 0.72 |
| Poland           |       | 0.14  | 6.05 | 2300.7  | 126.1 | 0.80 |
| Portugal         |       | 0.85  | 5.89 | 9045.7  | 108.1 | 0.83 |
| Romania          |       | -0.02 | 3.60 | 1302.3  | 99.4  | 0.78 |
| Russia           |       | 0.00  | 3.85 | 3000.1  | 8.8   | 0.82 |
| Saudi Arabia     | -0.79 | -0.79 | 3.17 | 6917.2  |       | 0.71 |
| Senegal          | -0.67 | -0.66 | 3.10 | 649.8   | 40.6  | 0.38 |
| Sierra Leone     | -3.03 | -3.02 | 1.97 | 194.8   | 59.3  |      |
| Somalia          | -0.15 | -0.16 | 1.99 |         |       |      |
| South Africa     | -0.21 | -0.18 | 6.38 | 3471.1  | 30.5  | 0.72 |
| Spain            |       | 0.00  | 5.46 | 14038.1 | 78.2  | 0.88 |
| Sri Lanka        | -1.19 | -1.09 | 3.00 | 578.7   | 271.4 | 0.70 |
| South Korea      | -0.21 | -0.17 | 5.67 | 7947.3  | 446.5 | 0.82 |
| Sudan            | -0.83 | -0.83 | 2.18 | 487.7   |       | 0.43 |
| Suriname         | -0.08 | -0.08 | 2.63 | 1428.8  |       |      |
| Sweden           |       | -0.01 | 9.85 | 26427.3 | 21.1  | 0.90 |
| Switzerland      |       | 0.00  | 9.85 | 36414.9 | 174.3 | 0.91 |
| Syria            | -4.98 | -2.24 | 3.42 | 1058.1  | 71.4  | 0.64 |
| Taiwan           |       |       | 5.54 | 10241.8 | 576.3 |      |
| Tanzania         | -0.97 | -0.97 | 3.54 | 191.0   | 31.2  | 0.42 |
| Thailand         | -2.77 | -2.65 | 4.72 | 2078.9  | 112.8 | 0.72 |
| Togo             | -1.47 | -1.44 | 2.31 | 372.6   | 70.1  | 0.47 |

|                      |       |       |      |         |       |      |
|----------------------|-------|-------|------|---------|-------|------|
| Tunisia              | -0.80 | -0.53 | 3.38 | 1757.5  | 52.4  | 0.65 |
| Turkey               |       | 0.00  | 4.03 | 2666.4  | 76.6  | 0.69 |
| United Arab Emirates | 0.00  | 0.00  | 3.06 | 18160.7 |       |      |
| Uganda               | -0.95 | -0.95 | 2.69 | 207.8   | 88.9  | 0.39 |
| United Kingdom       |       | 0.54  | 8.14 | 17866.3 | 240.5 | 0.88 |
| United States        |       | 0.28  | 8.31 | 25430.8 | 28.0  | 0.92 |
| Uruguay              | -0.05 | -0.05 | 2.87 | 4502.9  | 18.1  | 0.80 |
| Venezuela            | -1.12 | -1.11 | 3.50 | 2908.8  | 23.4  | 0.76 |
| Vietnam              | -1.69 | -1.43 | 3.10 | 182.1   | 213.9 | 0.61 |
| Zambia               | -0.83 | -0.82 | 2.90 | 398.3   | 11.3  | 0.46 |
| Zimbabwe             | -0.57 | -0.57 | 4.11 | 707.6   | 26.9  | 0.59 |

---

Supplementary information for 2003-06-05570A: Table 2

| Country       | Elephant population change (%) | Black rhino population change (%) | Mean modelled governance score | Mean per capita GDP | Mean population density (km <sup>-2</sup> ) | Mean HDI score | Adjusted spending per km <sup>2</sup> of PA |
|---------------|--------------------------------|-----------------------------------|--------------------------------|---------------------|---------------------------------------------|----------------|---------------------------------------------|
| Angola        |                                | -85.7                             | 2.85                           | 776.0               |                                             |                |                                             |
| Botswana      | 62.7                           |                                   | 4.90                           | 2582.7              | 2.3                                         | 0.64           | 57.4                                        |
| Cameroon      | -32.0                          | -10.0                             | 3.44                           | 1029.2              | 24.7                                        | 0.51           | 13.0                                        |
| Congo         | -32.3                          |                                   | 2.70                           | 1176.8              | 6.5                                         | 0.51           |                                             |
| Cote d'Ivoire | -61.6                          |                                   | 4.15                           | 886.7               | 36.6                                        | 0.41           | 79.7                                        |
| DRC           | -67.2                          |                                   | 1.50                           | 211.6               | 16.5                                        |                | 4.1                                         |
| Ethiopia      | -90.1                          |                                   | 2.24                           | 170.3               | 46.0                                        | 0.29           | 5.0                                         |
| Gabon         | -18.7                          |                                   | 2.84                           | 5134.6              | 3.7                                         |                | 7.0                                         |
| Ghana         | -71.2                          |                                   | 3.47                           | 392.6               | 65.3                                        | 0.50           | 157.0                                       |
| Kenya         | -32.0                          | 9.5                               | 3.85                           | 339.8               | 41.4                                        | 0.52           | 88.5                                        |
| Malawi        | -17.0                          |                                   | 3.00                           | 201.7               | 90.1                                        | 0.36           | 51.9                                        |
| Mozambique    | -5.9                           | -50.0                             | 3.71                           | 164.9               | 18.2                                        | 0.30           |                                             |
| Namibia       | 42.5                           | 29.8                              | 5.20                           | 1752.7              | 1.6                                         |                | 74.5                                        |
| Nigeria       | -55.2                          |                                   | 2.50                           | 272.7               | 105.8                                       | 0.42           | 107.0                                       |
| Somalia       | -58.3                          |                                   | 2.55                           |                     |                                             |                |                                             |
| South Africa  | 22.5                           | 55.5                              | 6.48                           | 3086.5              | 28.9                                        | 0.70           | 1672.4                                      |
| Sudan         | -100.0                         |                                   | 2.10                           | 594.8               |                                             | 0.41           |                                             |
| Tanzania      | -45.8                          | -52.0                             | 3.19                           | 203.8               | 28.9                                        | 0.42           | 178.3                                       |
| Uganda        | -38.4                          |                                   | 2.46                           | 273.9               | 82.0                                        | 0.39           |                                             |
| Zambia        | -44.4                          | -79.3                             | 2.65                           | 419.7               | 10.5                                        | 0.47           |                                             |
| Zimbabwe      | 42.5                           | -78.5                             | 3.71                           | 784.0               | 25.2                                        | 0.61           | 449.5                                       |

## Supplementary information for 2003-06-05570A: Table 3

| Country            | Governance score (2002) | Does country contain a hotspot? | Does country contain an EBA? | Does country contain a Focal 25 ecoregion? | Adjusted species richness (km <sup>-2</sup> ) |
|--------------------|-------------------------|---------------------------------|------------------------------|--------------------------------------------|-----------------------------------------------|
| Albania            | 2.50                    | Yes                             | No                           | No                                         | 23.2                                          |
| Angola             | 1.70                    | No                              | Yes                          | Yes                                        | 31.2                                          |
| Argentina          | 2.80                    | Yes                             | Yes                          | Yes                                        | 29.9                                          |
| Australia          | 8.60                    | Yes                             | Yes                          | No                                         | 17.3                                          |
| Austria            | 7.80                    | No                              | No                           | No                                         | 17.5                                          |
| Bangladesh         | 1.20                    | Yes                             | Yes                          | No                                         | 21.3                                          |
| Belgium            | 7.10                    | No                              | No                           | No                                         | 18.0                                          |
| Bolivia            | 2.20                    | Yes                             | Yes                          | Yes                                        |                                               |
| Botswana           | 6.40                    | No                              | No                           | Yes                                        | 20.1                                          |
| Brazil             | 4.00                    | Yes                             | Yes                          | Yes                                        | 35.6                                          |
| Bulgaria           | 4.00                    | No                              | No                           | No                                         | 17.6                                          |
| Cameroon           | 2.20                    | Yes                             | Yes                          | Yes                                        | 42.1                                          |
| Canada             | 9.00                    | No                              | No                           | No                                         | 11.2                                          |
| Chile              | 7.50                    | Yes                             | Yes                          | Yes                                        | 13.2                                          |
| China              | 3.50                    | Yes                             | Yes                          | Yes                                        | 27.2                                          |
| Colombia           | 3.60                    | Yes                             | Yes                          | Yes                                        | 64.5                                          |
| Costa Rica         | 4.50                    | Yes                             | Yes                          | No                                         | 53.6                                          |
| Cote d'Ivoire      | 2.70                    | Yes                             | Yes                          | No                                         | 32.2                                          |
| Denmark            | 9.50                    | No                              | No                           | No                                         | 16.7                                          |
| Dominican Republic | 3.50                    | Yes                             | Yes                          | No                                         | 10.5                                          |
| Ecuador            | 2.20                    | Yes                             | Yes                          | Yes                                        | 73.7                                          |
| Egypt              | 3.40                    | No                              | No                           | No                                         | 8.0                                           |
| El Salvador        | 3.40                    | Yes                             | Yes                          | No                                         | 32.2                                          |
| Ethiopia           | 3.50                    | No                              | Yes                          | Yes                                        | 27.2                                          |
| Finland            | 9.70                    | No                              | No                           | No                                         | 13.1                                          |
| France             | 6.30                    | Yes                             | No                           | No                                         | 13.3                                          |

|             |      |     |     |     |      |
|-------------|------|-----|-----|-----|------|
| Germany     | 7.30 | No  | No  | No  | 13.0 |
| Ghana       | 3.90 | Yes | Yes | No  | 34.4 |
| Greece      | 4.20 | Yes | No  | No  | 18.3 |
| Guatemala   | 2.50 | Yes | Yes | No  | 39.0 |
| Haiti       | 2.20 | Yes | Yes | No  | 6.1  |
| Honduras    | 2.70 | Yes | Yes | No  | 32.5 |
| Hong Kong   | 8.20 | No  | No  | No  |      |
| Hungary     | 4.90 | No  | No  | No  | 16.5 |
| Iceland     | 9.40 | No  | No  | No  | 5.6  |
| India       | 2.70 | Yes | Yes | Yes | 29.9 |
| Indonesia   | 1.90 | Yes | Yes | Yes | 54.2 |
| Ireland     | 6.90 | No  | No  | No  | 10.3 |
| Israel      | 7.30 | Yes | No  | No  | 24.7 |
| Italy       | 5.20 | Yes | No  | No  | 13.9 |
| Jamaica     | 4.00 | Yes | Yes | No  | 13.4 |
| Japan       | 7.10 | No  | Yes | No  | 17.7 |
| Jordan      | 4.50 | No  | No  | No  | 12.3 |
| Kenya       | 1.90 | Yes | Yes | Yes | 43.9 |
| Luxembourg  | 9.00 | No  | No  | No  |      |
| Madagascar  | 1.70 | Yes | Yes | Yes | 12.4 |
| Malawi      | 2.90 | No  | Yes | Yes | 40.9 |
| Malaysia    | 4.90 | No  | Yes | No  | 33.8 |
| Mexico      | 3.60 | Yes | Yes | Yes | 34.0 |
| Morocco     | 3.70 | Yes | No  | No  | 12.2 |
| Namibia     | 5.70 | Yes | Yes | Yes | 23.9 |
| Netherlands | 9.00 | No  | No  | No  | 18.1 |
| New Zealand | 9.50 | Yes | Yes | No  | 7.0  |
| Nicaragua   | 2.50 | Yes | Yes | No  | 36.5 |
| Nigeria     | 1.60 | Yes | Yes | No  | 30.9 |
| Norway      | 8.50 | No  | No  | No  | 12.6 |
| Pakistan    | 2.60 | No  | Yes | Yes | 17.8 |
| Panama      | 3.00 | Yes | Yes | No  | 57.5 |
| Paraguay    | 1.70 | Yes | Yes | Yes | 34.3 |

|                   |      |     |     |     |      |
|-------------------|------|-----|-----|-----|------|
| Peru              | 4.00 | Yes | Yes | Yes | 59.5 |
| Philippines       | 2.60 | Yes | Yes | No  | 15.2 |
| Poland            | 4.00 | No  | No  | No  | 13.2 |
| Portugal          | 6.30 | No  | Yes | No  | 15.5 |
| Romania           | 2.60 | No  | No  | No  | 15.1 |
| Russia            | 2.70 | Yes | Yes | Yes | 14.0 |
| Senegal           | 3.10 | No  | No  | No  | 27.5 |
| Singapore         | 9.30 | Yes | No  | No  | 40.9 |
| South Africa      | 4.80 | Yes | Yes | No  | 25.6 |
| South Korea       | 4.50 | No  | No  | No  | 9.1  |
| Spain             | 7.10 | Yes | Yes | No  | 13.5 |
| Sri Lanka         | 3.70 | Yes | Yes | No  | 21.2 |
| Sweden            | 9.30 | No  | No  | No  | 12.2 |
| Switzerland       | 8.50 | No  | No  | No  | 19.0 |
| Taiwan            | 5.60 | No  | Yes | No  |      |
| Tanzania          | 2.70 | Yes | Yes | No  | 37.3 |
| Thailand          | 3.20 | Yes | No  | No  | 33.0 |
| Trinidad & Tobago | 4.90 | No  | No  | No  | 42.5 |
| Tunisia           | 4.80 | No  | No  | No  | 12.5 |
| Turkey            | 3.20 | Yes | Yes | No  | 14.1 |
| Uganda            | 2.10 | No  | Yes | Yes | 55.3 |
| United Kingdom    | 8.70 | No  | No  | No  | 12.6 |
| United States     | 7.70 | Yes | Yes | Yes | 19.7 |
| Uruguay           | 5.10 | Yes | Yes | Yes | 15.6 |
| Venezuela         | 2.50 | Yes | Yes | Yes | 54.3 |
| Vietnam           | 2.40 | Yes | Yes | Yes | 31.3 |
| Zambia            | 2.60 | No  | Yes | Yes | 28.5 |
| Zimbabwe          | 2.70 | No  | Yes | Yes | 32.2 |

---
